# Supplementary material for: Sec61p Is Required for ERAD-L: GENETIC DISSECTION OF THE TRANSLOCATION AND ERAD-L FUNCTIONS OF Sec61P USING NOVEL DERIVATIVES OF CPY
Source: PubMed Central journal article supplement — J Biol Chem. 2008 Dec 5;283(49):33883–8. doi: 10.1074/jbc.M803054200 (PMC2590686; doi:10.1074/jbc.m803054200), 2008-12-05
Supplement: M803054200_1.pdf [file M803054200_1.pdf]

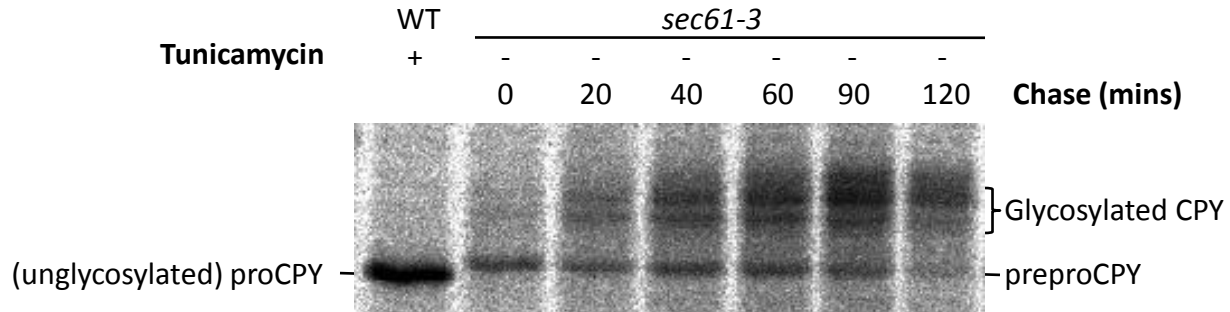

**Supplementary Figure 1.** PreproCPY translocates slowly in *sec61-3* mutant cells. MWY63 (*sec61-3*) cells containing pMW346 (preproCPY) were grown at 30°C to an  $OD_{600nm}$  of 0.2 then shifted to 17°C for 2 hours prior to labelling with 10 $\mu$ Ci of <sup>35</sup>S Methionine Cysteine mix / $OD_{600nm}$  for 20 minutes. These pulse-labelled cells were then chased following the addition of 2mM each of Methionine and Cysteine plus 10 $\mu$ g/ml cycloheximide. Cell extracts were prepared after either 0, 20, 40, 60, 90 or 120 minutes of chase (as indicated) and immunoprecipitated CPY analysed by SDS-PAGE as described in materials and methods. As a control, wildtype cells expressing native CPY were labelled following 30 minutes pretreatment with Tunicamycin in order to accumulate unglycosylated proCPY as a migration control .
